# Supplementary material
Source: MDPI journal article supplement (https://www.mdpi.com/1424-2818/14/4/282)
Supplement: s1 [file s1]

# Supplementary Material - Structure and composition of rhodolith beds from the Sergipe-Alagoas Basin (NE Brazil, Southwestern Atlantic)

Nicholas F.L. Vale <sup>1,2</sup>, Juan C. Braga <sup>2</sup>, Alex C. Bastos <sup>3</sup>, Fernando C. Moraes <sup>4</sup>, Claudia S. Karez <sup>1</sup>, Ricardo G. Bahia <sup>1</sup>, Luís A. Leão <sup>1</sup>, Renato C. Pereira<sup>1,5</sup>, Gilberto M. Amado-Filho <sup>1,†</sup>, Leonardo T. Salgado <sup>1,\*</sup>

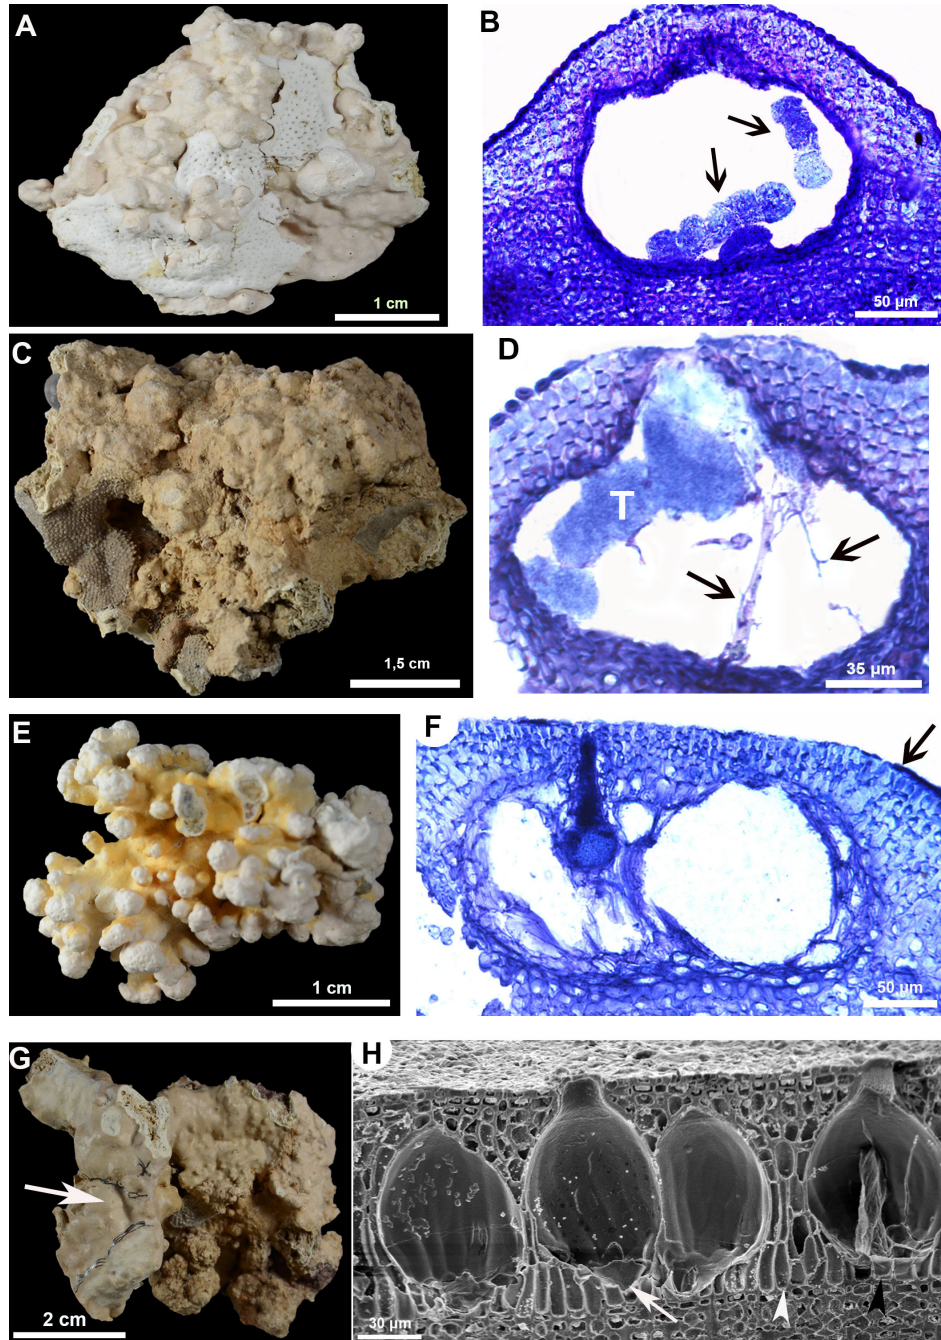

**Figure S1.** External morphology and anatomy of identified coralline algae species. *Harveyolithon* gr. *rupestre* (A) Specimen with encrusting to warty growth form; (B) Vertical section showing an uniporate tetrasporangial conceptacle flush or slightly raised above the surrounding thallus surface, with tetrasporangia along the conceptacle floor (arrows); *Pneophyllum* gr. *fragile* (C) Specimen with encrusting growth form; (D) Vertical section of a uniporate tetrasporangial conceptacle with a tetrasporangia on the floor and interspersed filaments among the tetrasporangia (arrow); *Melyvonnea erubescens* (E) Specimen with encrusting to warty growth form; (F) Vertical section showing the flattened roof surface (arrow); note a tetrasporangia still connected to the pore canal; *Sporolithon franciscanum* (G) Habit of holotype; (H) SEM view of the upper portion of the thallus showing the paraphyses (white arrowhead) between tetrasporangial chambers, a tetrasporangia subtended by a single stalk cell (arrow) and chambers with a basal layer of elongate cells (black arrowhead).

**Table S1.** Remotely Operated Vehicle (ROV) log sheet at different depths on the South sector of the SEAL shelf. Coordinates are in SIRGAS 2000 Datum.

| Line | Latitude (start) | Longitude (start) | Depth (m)<br>start | Latitude (end) | Longitude (end) | Depth (m)<br>end |
|------|------------------|-------------------|--------------------|----------------|-----------------|------------------|
| 1    | -11,075816       | -36,884563        | 29                 | -11,095702     | -36,857933      | 46               |
| 2    | -11,117404       | -36,888315        | 27                 | -11,129388     | -36,872269      | 44               |
| 3    | -11,138520       | -36,930717        | 25                 | -11,160102     | -36,902968      | 40               |
| 4    | -11,184261       | -36,976190        | 27                 | -11,205673     | -36,947461      | 42               |

**Table S2.** Voucher samples of coralline algae deposited in the in the Herbarium of the Rio de Janeiro Botanical Garden (RB). Coordinates in SIRGAS 2000 Datum.

| Family        | Genus                         | Latitude | Longitude | Depth (m) | Voucher   |
|---------------|-------------------------------|----------|-----------|-----------|-----------|
| Corallinaceae | <i>Harveyolithon rupestre</i> | -111.642 | -368.839  | 47        | RB 797663 |
| Corallinaceae | <i>Harveyolithon rupestre</i> | -111.642 | -368.839  | 47        | RB 797664 |
| Corallinaceae | <i>Harveyolithon rupestre</i> | -102.789 | -359.792  | 30        | RB 797679 |
| Corallinaceae | <i>Lithophyllum</i> sp.       | -104.875 | -361.245  | 30        | RB 797660 |
| Corallinaceae | <i>Spongites</i> sp.          | -108.223 | -366.118  | 27        | RB 797662 |
| Hapalidiaceae | <i>Roseolithon</i> sp.        | -102.789 | -359.792  | 30        | RB 797666 |
| Hapalidiaceae | <i>Roseolithon</i> sp.        | -102.789 | -359.792  | 30        | RB 797667 |
| Hapalidiaceae | <i>Roseolithon</i> sp.        | -102.789 | -359.792  | 30        | RB 797668 |
| Hapalidiaceae | <i>Roseolithon</i> sp.        | -102.789 | -359.792  | 30        | RB 797671 |
| Hapalidiaceae | <i>Roseolithon</i> sp.        | -102.789 | -359.792  | 30        | RB 797672 |

|                |                                 |          |          |    |           |
|----------------|---------------------------------|----------|----------|----|-----------|
| Hapalidiaceae  | <i>Roseolithon</i> sp.          | -102.789 | -359.792 | 30 | RB 797673 |
| Hapalidiaceae  | <i>Roseolithon</i> sp.          | -102.789 | -359.792 | 30 | RB 797674 |
| Hapalidiaceae  | <i>Roseolithon</i> sp.          | -108.223 | -366.118 | 27 | RB 797675 |
| Hapalidiaceae  | <i>Roseolithon</i> sp.          | -113.389 | -370.556 | 54 | RB 797676 |
| Hapalidiaceae  | <i>Melyvonnea erubescens</i>    | -102.789 | -359.792 | 30 | RB 797677 |
| Hapalidiaceae  | <i>Melyvonnea erubescens</i>    | -102.789 | -359.792 | 30 | RB 797678 |
| Mastoporaceae  | <i>Pneophyllum fragile</i>      | -111.642 | -368.839 | 47 | RB 797661 |
| Sporolithaceae | <i>Sporolithon franciscanum</i> | -111.642 | -368.839 | 47 | RB 797665 |

---

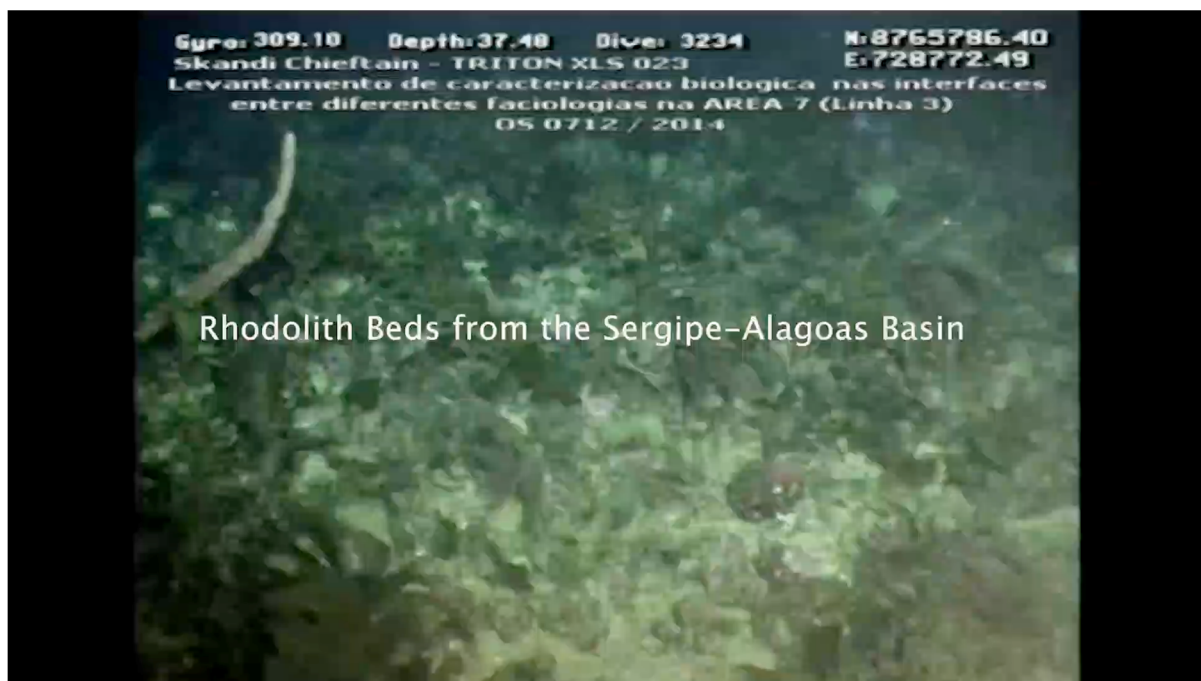

**Video S1.** Video obtained from ROV surveys on the middle to outer shelf of the SEAL shelf (South Sector).
